# Supplementary material
Source: PubMed Central journal article supplement (PMC3708367)

## Supplementary Figure legends

**Supplementary figure 1. The LXR-IDOL pathway targets the LDLR membrane pool for lysosomal degradation.** (A) HeLa cells were cultured as indicated in the presence or absence of 2 $\mu$ M of the synthetic LXR agonist GW3965 for four hours and 100nM Bafilomycin A1. LDLR at the cell surface was determined by FACS analysis. Cell surface LDLR in sterol-depletion medium was set to 100% (n=6, \*  $p$ <0.01) (B) HepG2 cells were cultured in sterol-depletion medium in the presence or absence of 2 $\mu$ M of the synthetic LXR agonist GW3965 for four hours and 100nM Bafilomycin A1 or 10mM NH<sub>4</sub>Cl. Total cell lysates were analyzed by immunoblotting as indicated.

**Supplementary figure 2. ARH is not required for degradation of the LDLR by IDOL.** Fibroblasts in which WT *LDLR* or Y828C *LDLR* were stably introduced were incubated for 30 minutes with 5 $\mu$ g/mL DyLight 488-labeled LDL. Internalized LDL was quantified by measuring fluorescence in total cell lysates. LDL uptake in WT *LDLR* cells was set to 100%. Each bar and error represent the average  $\pm$  SD (n=3, \*  $p$ <0.01). (B) HepG2 cells were transfected with 20nM of control or *ARH* siRNA and subsequently incubated for 16 hours with sterol-depletion medium followed by treatment with vehicle or 1 $\mu$ M GW3965 for 6 hours. Total cell lysates were analyzed by immunoblotting as indicated.

**Supplementary figure 3. IDOL-stimulated degradation the LDLR does not require dynamin.** (A,B) A431 and (C,D) HeLa cells were incubated for 16 hours in sterol-depletion medium. Subsequently, cells were treated with 1 $\mu$ M GW3965 or vehicle in the presence or absence of 80  $\mu$ M Dynasore for 4 hours. Total cell lysates were analyzed by immunoblotting. A representative immunoblot of two independent experiments is shown (A,C). For LDL uptake (B,D) cells were incubated for 30 minutes with 5 $\mu$ g/mL DyLight 488-labeled LDL. Internalized LDL was quantified by measuring fluorescence in total cell lysates. LDL uptake in vehicle-treated cells was set to 100%. Each bar and error represent the average  $\pm$  SD (n=4, \*  $p$ <0.01 from vehicle treated cells).

**Supplementary figure 4. The LXR-IDOL degradation pathway targets a lipid-raft resident LDLR pool.** HepG2 cells were cultured in sterol-depletion medium with vehicle or 1 $\mu$ M GW3965 for 4 hours. Membrane fractions were isolated and an equal amount of protein per fraction was separated by SDS-PAGE and immunoblotted as indicated.

**Supplementary figure 5. Epsin1 over-expression blocks IDOL-mediated degradation of the VLDLR and leads to accumulation of ubiquitylated receptor.** (A) HEK293T cells were transfected with expression plasmids for VLDLR-HA, FLAG-IDOL, Myc-rEpn1, and GFP to monitor transfection efficiency. Samples were immunoprecipitated and analyzed by immunoblotting as indicated.

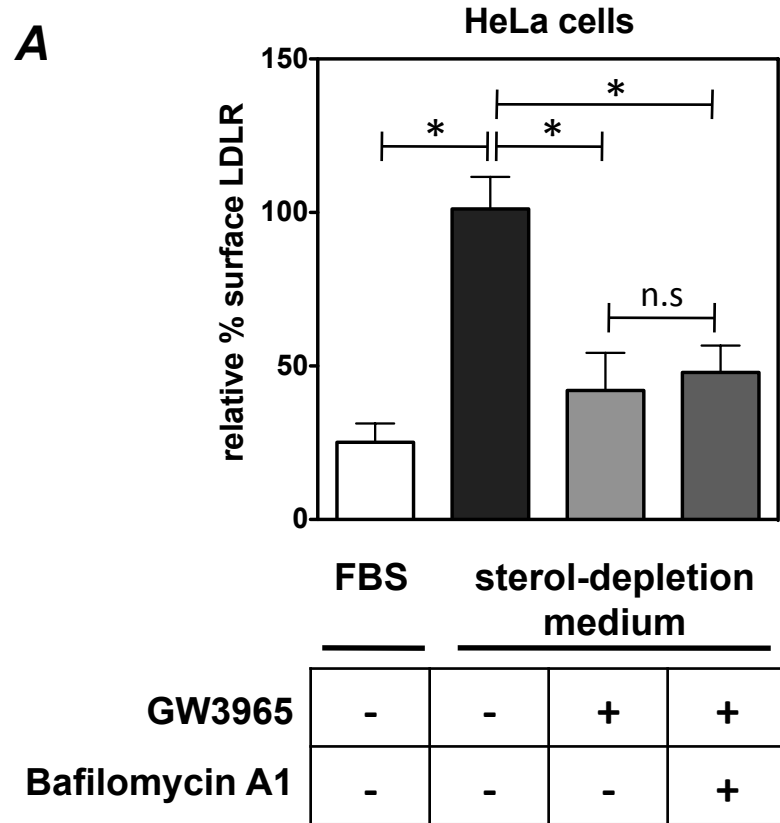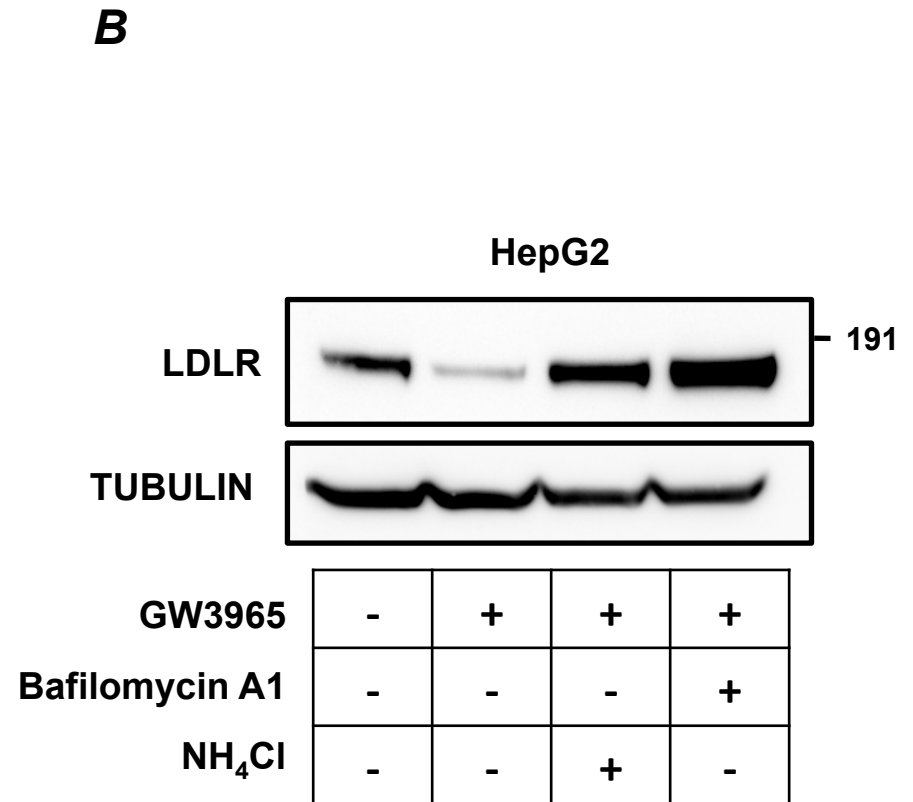

Sorrentino *et al.* Supplementary Figure 2

**A**

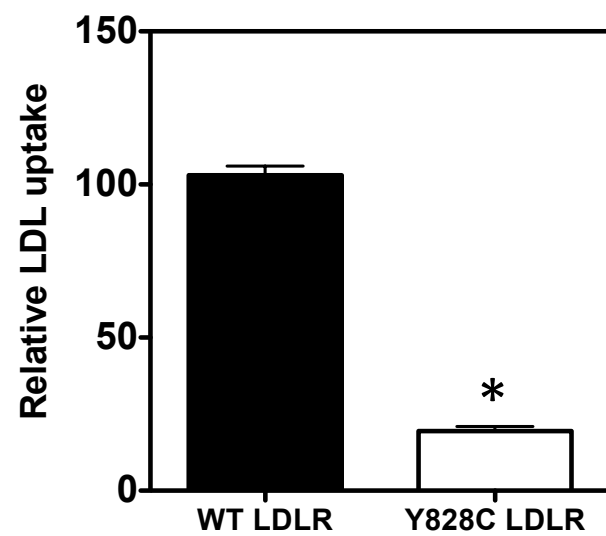

**B**

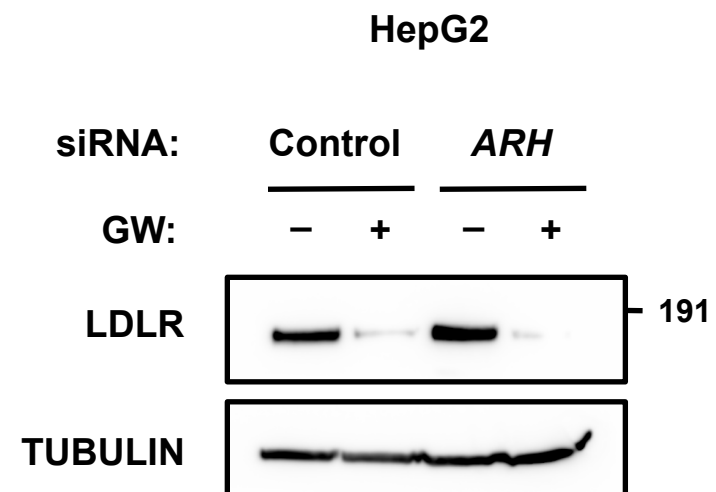

Sorrentino *et al.* Supplementary Figure 3

**A**

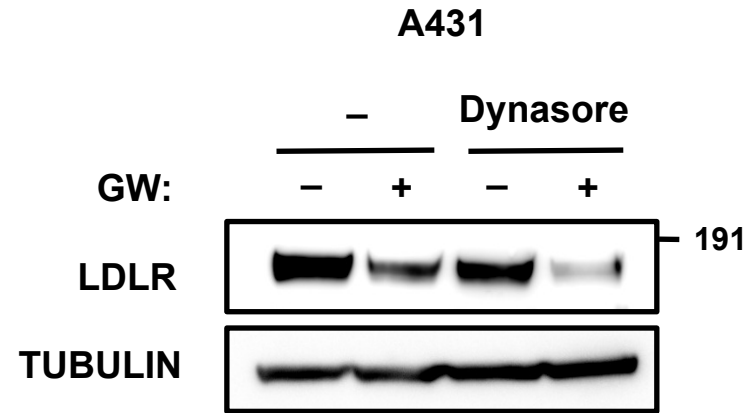

**B**

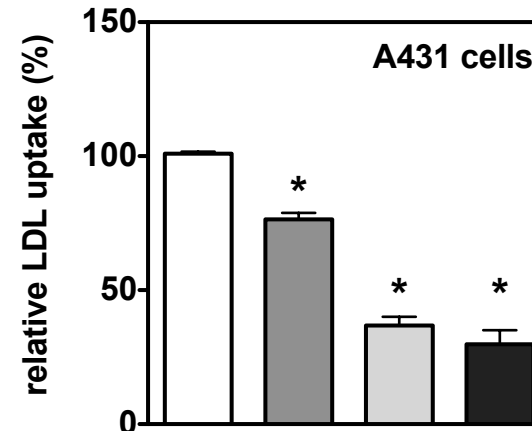

**C**

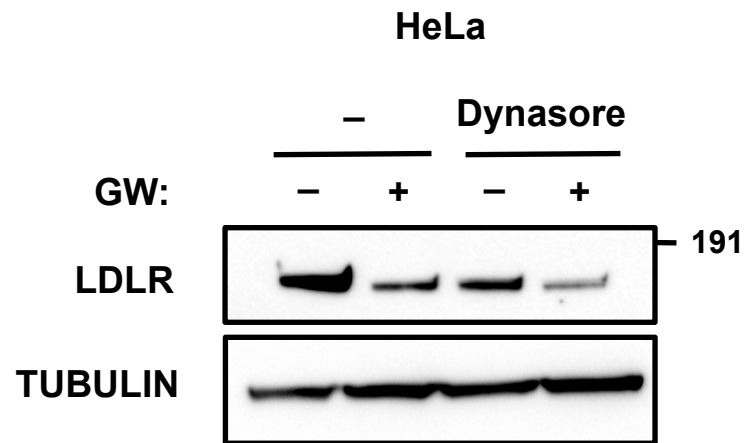

**D**

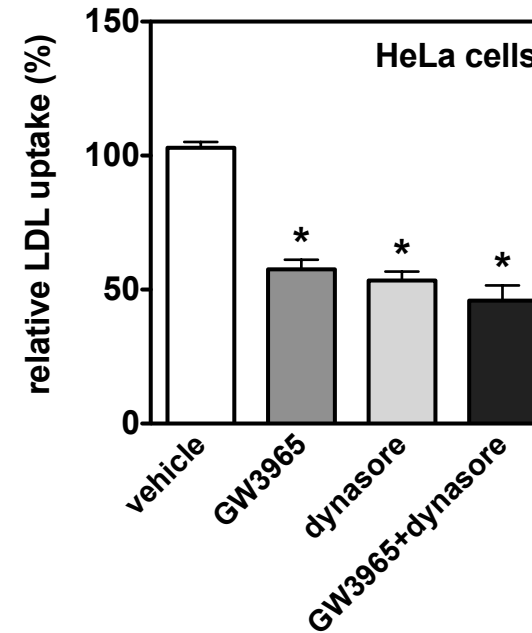



Sorrentino *et al.* Supplementary Figure 5

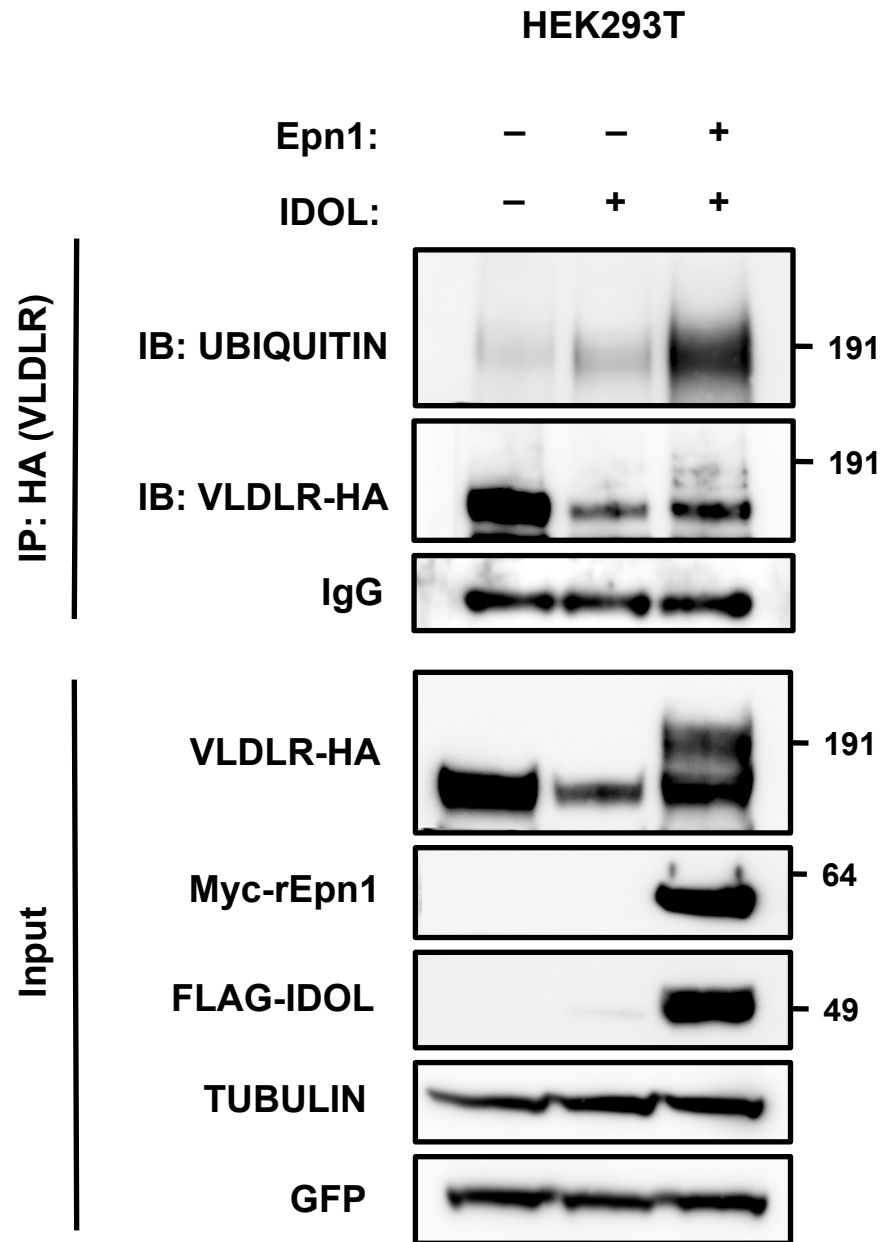

Supplement: supp_M037713_jlr.M037713-1.pdf [file supp_M037713_jlr.M037713-1.pdf]
